# Supplementary material
Source: Springer Nature journal article supplement (https://www.springermedizin.de/resource/supplementary/13054_2012_648_MOESM8_ESM.pdf/9708942)

A

5 hour stimulation

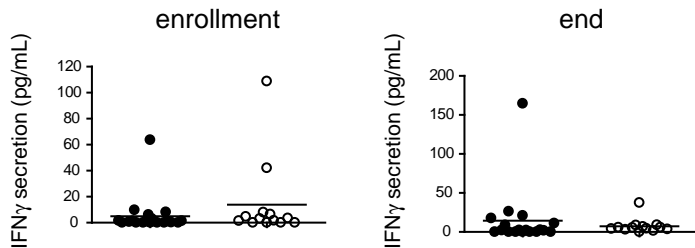

C

5 hour stimulation

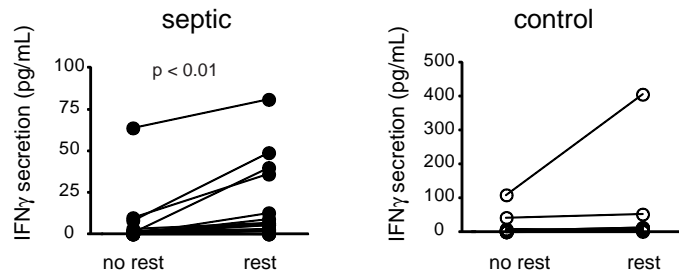

B

48 hour stimulation

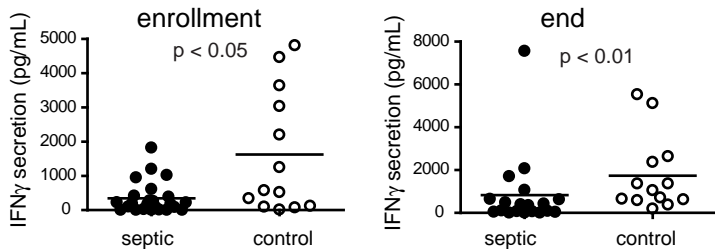

D

48 hour stimulation

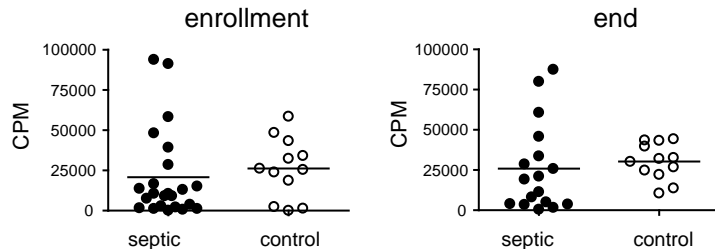

Supplement: MOESM8 [file 9708942]
